# Supplementary material for: Male Infertility Increases the Risk of Cardiovascular Diseases: A Nationwide Population-Based Cohort Study in Taiwan
Source: PubMed Central journal article supplement — World J Mens Health. 2022 Jan 1;40(3):490–500. doi: 10.5534/wjmh.210098 (PMC9253797; doi:10.5534/wjmh.210098), 2022-01-01
Supplement: wjmh-40-490-s001.pdf [file wjmh-40-490-s001.pdf]

**Supplement Table 1.** Characteristics of participants at the endpoint

| Variable                | Infertility    |                | p-value |
|-------------------------|----------------|----------------|---------|
|                         | With           | Without        |         |
| Overall                 | 2,326 (20.00)  | 9,304 (80.00)  |         |
| CVDs                    |                |                | <0.001  |
| Without                 | 1,929 (82.93)  | 8,203 (88.17)  |         |
| With                    | 397 (17.07)    | 1,101 (11.83)  |         |
| Age (y)                 | 37.05±8.96     | 37.59±9.91     | 0.018   |
| Married                 |                |                | <0.001  |
| No                      | 741 (31.86)    | 4,662 (50.11)  |         |
| Yes                     | 1,585 (68.14)  | 4,642 (49.89)  |         |
| Education (y)           |                |                | <0.001  |
| <12                     | 732 (31.47)    | 4,660 (50.09)  |         |
| ≥12                     | 1,594 (68.53)  | 4,644 (49.91)  |         |
| Insurance premium (TWD) |                |                | <0.001  |
| <18,000                 | 1,614 (69.39)  | 9,145 (98.29)  |         |
| 18,000–34,999           | 369 (15.86)    | 102 (1.10)     |         |
| ≥35,000                 | 343 (14.75)    | 57 (0.61)      |         |
| DM                      |                |                | <0.001  |
| Without                 | 2,224 (95.61)  | 8,727 (93.80)  |         |
| With                    | 102 (4.39)     | 577 (6.20)     |         |
| Metabolic syndrome      |                |                | -       |
| Without                 | 2,326 (100.00) | 9,304 (100.00) |         |
| With                    | 0 (0.00)       | 0 (0.00)       |         |
| Hyperlipidemia          |                |                | 0.972   |
| Without                 | 2,276 (97.85)  | 9,101 (97.82)  |         |
| With                    | 50 (2.15)      | 203 (2.18)     |         |
| CKD                     |                |                | 0.018   |
| Without                 | 2,295 (98.67)  | 9,108 (97.89)  |         |
| With                    | 31 (1.33)      | 196 (2.11)     |         |
| COPD                    |                |                | <0.001  |
| Without                 | 2,216 (95.27)  | 9,156 (98.41)  |         |
| With                    | 110 (4.73)     | 148 (1.59)     |         |
| Scrotal varices         |                |                | <0.001  |
| Without                 | 1,873 (80.52)  | 9,259 (99.52)  |         |
| With                    | 453 (19.48)    | 45 (0.48)      |         |
| Obesity                 |                |                | 0.052   |
| Without                 | 2,321 (99.79)  | 9,296 (99.91)  |         |
| With                    | 5 (0.21)       | 8 (0.09)       |         |
| Depression              |                |                | 0.003   |
| Without                 | 2,301 (98.93)  | 9,220 (99.10)  |         |
| With                    | 25 (1.07)      | 84 (0.90)      |         |
| Anxiety                 |                |                | 0.001   |
| Without                 | 2,316 (99.57)  | 9,285 (99.80)  |         |
| With                    | 10 (0.43)      | 19 (0.20)      |         |
| Manic disorder          |                |                | 0.187   |
| Without                 | 2,320 (99.74)  | 9,265 (99.58)  |         |
| With                    | 6 (0.26)       | 39 (0.42)      |         |
| Alcoholic psychoses     |                |                | <0.001  |
| Without                 | 2,326 (100.00) | 9,161 (98.46)  |         |
| With                    | 0 (0.00)       | 143 (1.54)     |         |

**Supplement Table 1.** Continued

| Variable             | Infertility    |               | p-value |
|----------------------|----------------|---------------|---------|
|                      | With           | Without       |         |
| Tobacco use disorder |                |               | 0.983   |
| Without              | 2,326 (100.00) | 9,303 (99.99) |         |
| With                 | 0 (0.00)       | 1 (0.01)      |         |
| Season               |                |               | <0.001  |
| Spring               | 694 (29.84)    | 2,351 (25.27) |         |
| Summer               | 538 (23.13)    | 2,487 (26.73) |         |
| Autumn               | 633 (27.21)    | 2,423 (26.04) |         |
| Winter               | 461 (19.82)    | 2,043 (21.96) |         |
| Location             |                |               | <0.001  |
| Northern             | 1,210 (52.02)  | 3,825 (41.11) |         |
| Central              | 465 (19.99)    | 2,601 (27.96) |         |
| Southern             | 540 (23.22)    | 2,377 (25.55) |         |
| Eastern              | 111 (4.77)     | 498 (5.35)    |         |
| Outlying islands     | 0 (0.00)       | 3 (0.03)      |         |
| Urbanization level   |                |               | <0.001  |
| 1                    | 917 (39.42)    | 3,345 (35.95) |         |
| 2                    | 998 (42.91)    | 3,824 (41.1)  |         |
| 3                    | 123 (5.29)     | 903 (9.71)    |         |
| 4                    | 288 (12.38)    | 1,232 (13.24) |         |
| Level of care        |                |               | <0.001  |
| Medical center       | 1,111 (47.76)  | 2,926 (31.45) |         |
| Regional hospital    | 853 (36.67)    | 3,605 (38.75) |         |
| Local hospital       | 362 (15.56)    | 2,773 (29.80) |         |

Values are presented as number (%) or mean ± standard deviation. CVD: cardiovascular disease, TWD: Taiwan New Dollars, DM: diabetes mellitus, CKD: chronic kidney disease, COPD: chronic obstructive pulmonary disease, -: not available. p-values are chi-square or Fisher exact test on category variables and t-test on continue variables.
