# Supplementary material for: Male Infertility Increases the Risk of Cardiovascular Diseases: A Nationwide Population-Based Cohort Study in Taiwan
Source: PubMed Central journal article supplement — World J Mens Health. 2022 Jan 1;40(3):490–500. doi: 10.5534/wjmh.210098 (PMC9253797; doi:10.5534/wjmh.210098), 2022-01-01
Supplement: wjmh-40-490-s002.pdf [file wjmh-40-490-s002.pdf]

**Supplement Table 2.** Years of follow-up

| <b>Infertility</b> | <b>Min</b> | <b>Median</b> | <b>Max</b> | <b>Mean±standard deviation</b> |
|--------------------|------------|---------------|------------|--------------------------------|
| With               | 1.00       | 10.57         | 15.74      | 11.72±11.64                    |
| Without            | 1.00       | 10.34         | 15.97      | 11.68±11.63                    |
| Overall            | 1.00       | 10.54         | 15.97      | 11.69±11.63                    |
