# Supplementary material for: Male Infertility Increases the Risk of Cardiovascular Diseases: A Nationwide Population-Based Cohort Study in Taiwan
Source: PubMed Central journal article supplement — World J Mens Health. 2022 Jan 1;40(3):490–500. doi: 10.5534/wjmh.210098 (PMC9253797; doi:10.5534/wjmh.210098), 2022-01-01
Supplement: wjmh-40-490-s003.pdf [file wjmh-40-490-s003.pdf]

**Supplement Table 3.** Years to cardiovascular disease diagnosis

| <b>Infertility</b> | <b>Min</b> | <b>Median</b> | <b>Max</b> | <b>Mean±standard deviation</b> |
|--------------------|------------|---------------|------------|--------------------------------|
| With               | 1.06       | 9.09          | 15.44      | 8.13±4.58                      |
| Without            | 1.01       | 9.57          | 15.89      | 8.41±4.09                      |
| Overall            | 1.01       | 9.27          | 15.89      | 8.35±4.21                      |
