# Supplementary material for: Male Infertility Increases the Risk of Cardiovascular Diseases: A Nationwide Population-Based Cohort Study in Taiwan
Source: PubMed Central journal article supplement — World J Mens Health. 2022 Jan 1;40(3):490–500. doi: 10.5534/wjmh.210098 (PMC9253797; doi:10.5534/wjmh.210098), 2022-01-01
Supplement: wjmh-40-490-s004.pdf [file wjmh-40-490-s004.pdf]

**Supplement Table 4.** Subgroup analysis association between different type of infertility and risk of CVDs by using Cox regression

| Type of infertility                       | Populations | Events | PYs        | Rate (per 10 <sup>5</sup> PYs) | Adjusted HR <sup>a</sup> | 95% CI      | p-value |
|-------------------------------------------|-------------|--------|------------|--------------------------------|--------------------------|-------------|---------|
| Men without infertility                   | 9,304       | 1,101  | 102,542.67 | 1,073.70                       | Reference                |             |         |
| Men with infertility                      | 2,326       | 397    | 27,187.45  | 1,460.23                       | 1.472                    | 1.288–1.683 | <0.001  |
| Azoospermia                               | 467         | 74     | 5,384.01   | 1,374.44                       | 1.388                    | 1.221–1.584 | <0.001  |
| Oligospermia                              | 225         | 35     | 2,587.12   | 1,352.86                       | 1.365                    | 1.191–1.562 | <0.001  |
| Infertility due to extratesticular causes | 13          | 0      | 296.15     | 0.00                           | 0.000                    | -           | 0.980   |
| Male infertility, unspecified             | 1,621       | 288    | 18,920.16  | 1,522.19                       | 1.556                    | 1.371–1.760 | <0.001  |

Values are presented as number only or mean only.

CVD: cardiovascular disease, PYs: person-years, HR: hazard ratio, CI: confidence interval, -: not available.

<sup>a</sup>Adjusted for the variables listed in Table 2.
