# Supplementary material for: Male Infertility Increases the Risk of Cardiovascular Diseases: A Nationwide Population-Based Cohort Study in Taiwan
Source: PubMed Central journal article supplement — World J Mens Health. 2022 Jan 1;40(3):490–500. doi: 10.5534/wjmh.210098 (PMC9253797; doi:10.5534/wjmh.210098), 2022-01-01
Supplement: wjmh-40-490-s005.pdf [file wjmh-40-490-s005.pdf]

**Supplement Table 5.** Cox regression in cardiovascular disease subgroup analysis

| CVD subgroup                 | Infertility |           |                   |                     |            |                   |                              |             |         |
|------------------------------|-------------|-----------|-------------------|---------------------|------------|-------------------|------------------------------|-------------|---------|
|                              | With        |           |                   | Without (Reference) |            |                   | With vs. Without (Reference) |             |         |
|                              | Events      | PYs       | Rate <sup>a</sup> | Events              | PYs        | Rate <sup>a</sup> | Adjusted HR <sup>b</sup>     | 95% CI      | p-value |
| Overall                      | 397         | 27,187.45 | 1,460.23          | 1,101               | 102,542.67 | 1,073.70          | 1.472                        | 1.288–1.683 | <0.001  |
| HTN                          | 261         | 27,187.45 | 960.00            | 770                 | 102,542.67 | 750.90            | 2.055                        | 1.668–2.532 | <0.001  |
| IHD                          | 66          | 27,187.45 | 242.76            | 216                 | 102,542.67 | 210.64            | 2.426                        | 1.773–3.320 | <0.001  |
| Stroke                       | 39          | 27,187.45 | 143.45            | 61                  | 102,542.67 | 59.49             | 2.261                        | 1.003–4.551 | 0.045   |
| Other forms of heart disease | 35          | 27,187.45 | 128.74            | 54                  | 102,542.67 | 52.66             | 1.372                        | 1.091–1.668 | 0.002   |

Values are presented as number only or mean only.

CVD: cardiovascular disease, PYs: person-years, HR: hazard ratio, CI: confidence interval, HTN: hypertension, IHD: ischemic heart disease.

<sup>a</sup>Rate: incidence (per 10<sup>5</sup> PYs). <sup>b</sup>Adjusted variables listed in Table 2.

In the endpoint, 4 patients had HTN and stroke diagnosis in the infertility cohort.
